# Supplementary material for: An artificial HSE promoter for efficient and selective detection of heat shock pathway activity
Source: PubMed Central journal article supplement (PMC4326385; doi:10.1007/s12192-014-0540-5), 2014-08-29

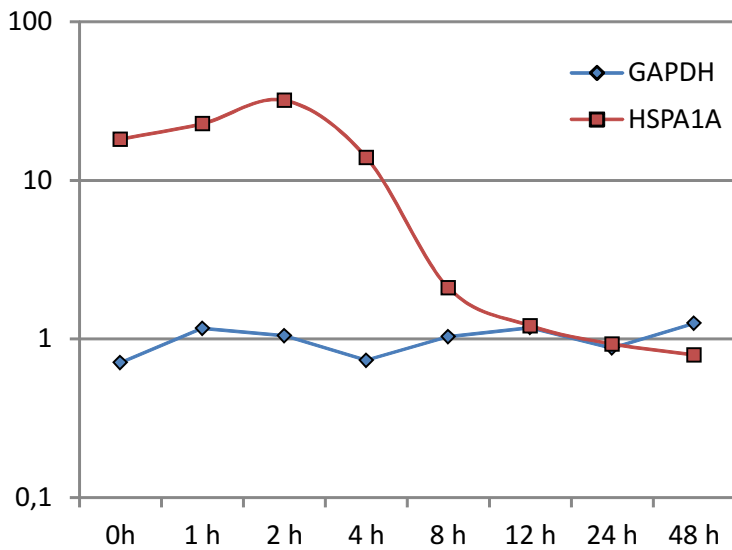

Supplement: 12192_2014_540_MOESM2_ESM.pdf [file 12192_2014_540_MOESM2_ESM.pdf]
